# Supplementary material
Source: PubMed Central journal article supplement (PMC3039728)
Supplement: supp_djq541_jnci-JNCI-10-0798-s01.pdf [file supp_djq541_jnci-JNCI-10-0798-s01.pdf]

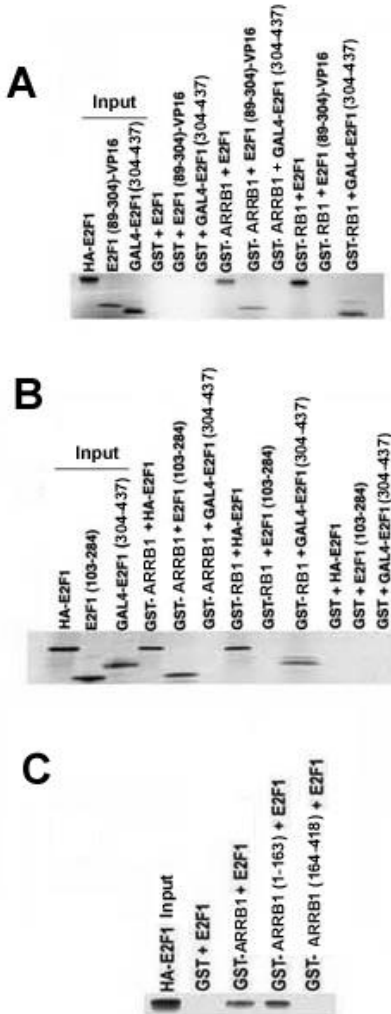

**Supplementary Figure 1. In vitro GST Pull-down Assays to Detect Binding Between**

**ARRB1 and E2F1.** A) The region encompassing amino acids 89-304 of E2F1 was found to bind with ARRB1. GST-RB1 protein was used as the positive control. The first three lanes in the figure represents 20% of the input <sup>35</sup>S-labeled-proteins used in the GST pull-down binding assay namely HA-E2F1, E2F1 (89-304)-VP16 and GAL4-E2F1 (304-437). These lanes are labeled as “input.” B) The region encompassing amino acids 103-284 of E2F1 protein was also found to bind with GST-ARRB1. The first two lanes (labeled as “input”) in the figure represents 20% of the input <sup>35</sup>S-Methionine-labeled-HA-E2F1 and

<sup>35</sup>S-Methionine-labeled-E2F1(103-284) used in the GST pull-down assay. C) The region encompassing amino acids 1-163 of ARRB1 was found to bind with E2F1. The first lane represents 20% of the input <sup>35</sup>S- Methionine-labeled-HA-E2F1 used in the GST pull-down assay. All the GST-pull-down experiments are representative of two independent experiments.
