# Supplementary material
Source: PubMed Central journal article supplement (PMC3039728)
Supplement: supp_djq541_jnci-JNCI-10-0798-s02.pdf [file supp_djq541_jnci-JNCI-10-0798-s02.pdf]

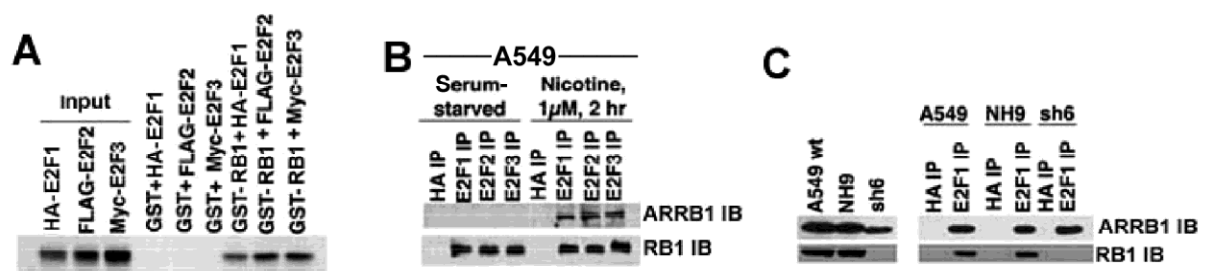

**Supplementary Figure 2. In vitro GST Pull-down Assays to Detect Binding Between**

**ARRB1 and E2F pathway proteins.**

A) The E2F family members namely E2F1, E2F2 and E2F3 bind to ARRB1 in vitro. The first three lanes (labeled as “input”) represent 20% of the input <sup>35</sup>S-Methionine-labeled-HA-E2F1, <sup>35</sup>S-Methionine-labeled FLAG-E2F2, <sup>35</sup>S-Methionine-labeled Myc-E2F3 used in the GST pull-down assay. B) Immunoprecipitation and immunoblot experiments were done to assess the binding of ARRB1 to E2F1, 2 and 3 in vivo. Immunoprecipitation with mouse-anti-human HA antibody was used as the negative control. C) Immunoprecipitation and immunoblot experiments were performed to examine the role of RB1 in E2F1-ARRB1 interaction. The direct binding of ARRB1 to E2F1 was found to be independent of RB1 status in A549 cells. Lysates were made from quiescent or nicotine-treated untransfected A549, A549 cells transfected with control vector (NH9) and A549 cells transfected with RB1-shRNA (sh6). Subsequently, these lysates were immunoprecipitated with mouse-anti-human E2F1 antibody. Immunoblot analysis of the E2F1-immunoprecipitates show that the ARRB1-E2F1 interaction is robustly detected in untransfected A549, NH9 and sh6 cells, All the immunoprecipitation and immunoblot experiments are representative of two independent experiments.
