# Supplementary material
Source: PubMed Central journal article supplement (PMC3039728)
Supplement: supp_djq541_jnci-JNCI-10-0798-s03.pdf [file supp_djq541_jnci-JNCI-10-0798-s03.pdf]

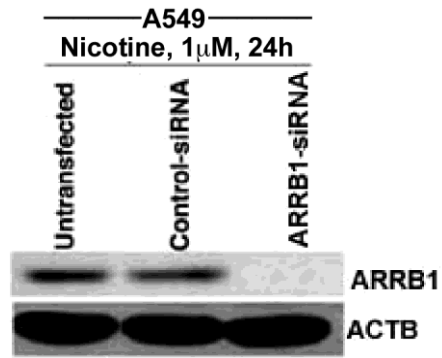

**Supplementary Figure 3. Immunoblot analysis to investigate the effect of transfection of ARRB1-siRNA in A549 human NSCLC cells.** A549 cells transfected with ARRB1-siRNA showed substantial suppression of ARRB1 expression, whereas cells transfected with a non-targeting control siRNA did not display any decrease in ARRB1 levels. ACTB was used as a loading control. All immunoblot experiments are representative of two independent experiments.
