# Supplementary material
Source: PubMed Central journal article supplement (PMC3039728)
Supplement: supp_djq541_jnci-JNCI-10-0798-s05.pdf [file supp_djq541_jnci-JNCI-10-0798-s05.pdf]

## Supplementary Methods

### Gene Constructs

We have described previously (1-5) the following constructs used in this study—pcDNA3-FLAG-rat ARRB1 (wild-type), the FLAG-tag sequence is N-DYKDDDDK-C (N and C represent the amino terminus and carboxyl terminus, respectively, of the peptide; D, Y, and K represent amino acids aspartic acid, tyrosine, and lysine, respectively); pGEX2TK; pGEX2TK-RB1; pGEX5X1-rat ARRB1 (wild-type); pGEX5X1-rat ARRB1 (amino acids 1–163); and pGEX5X1-rat ARRB1 (amino acids 163–418).

We have also described the following constructs in a previous study (4)—pcDNA3-influenza hemagglutinin (HA) epitope-E2F1; pcDNA3-FLAG-E2F2; pcDNA3-myelocytomatosis viral oncogene homolog (Myc)-tagged-E2F3; and pcDNA3-E2F1 (amino acids 103–284). Similarly, the constructs containing DNA-binding transcription factor required for the activation of yeast GAL genes in response to galactose (GAL4 DNA-binding domain) fused to E2F1 amino acids 304-437 (pcDNA3-GAL4-E2F1 [amino acids 304–437]), and E2F1 amino acids 89-304 fused to virion protein 16 (VP16) activation domain (pcDNA3-E2F1 [amino acids 89–304]-VP16) have also been previously published (4, 5).

### Primer Sequences for Chromatin Immunoprecipitation Assay

PCR was performed using the following primers:

*BIRC5* (Forward) 5'-CGCCTCTACTCCCAGAAG-3'

*BIRC5* (Reverse) 5'- TGTAGAGATGCGGTGGTC-3'

*CDC6* (Forward) 5'-GGC CTC ACA GCG ACT CTA AGA-3'

*CDC6* (Reverse) 5'-CTC GGA CTC ACC ACA AGC-3'

*CDC25A* (Forward) 5'-TCT GCT GGG AGT TTT CAT TGA CCT C-3'

*CDC25A* (Reverse) 5'-TTG GCG CCA AAC GGA ATC CAC CAA TC-3'

*TYMS* (Forward) 5'-GAC GGA GGC AGG CCA AGT G-3'

*TYMS* (Reverse) 5'- TGG CGC ACG CTC TCT AGA GC-3'

*FOS* (Forward) 5'-TGT TGG CTG CAG CCC GCG AGC AGT TC-3'

*FOS* (Reverse) 5'-GGC GCG TGT CCT AAT CTC GTG AGC AT-3'

### **Primer sequences for Real-time PCR**

Real-time PCR was performed with the following primers for *BIRC5*, *TYMS*, *CDC6* and *18S* RNA (6, 7):

*BIRC5* (Forward): 5'-ACTTGGCCCAGTGTTTCTTCT-3'.

*BIRC5* (Reverse): 5'-GAAAGCGCAACCGGACGAATG-3'.

*TYMS* (Forward): 5'-CTGCCAGCTGTACCAGAGAT-3'.

*TYMS* (Reverse): 5'-ATGTGCATCTCCCAAAGTGT-3'.

*CDC6* (Forward): 5'-CCCCATGATTGTGTTGGTAT-3'.

*CDC6* (Reverse): 5'-TTCAACAGCTGTGGCTTACA-3'.

*18SRNA* (Forward): 5'-CTCAACACGGGAAACCTCAC-3'.

*18SRNA* (Reverse): 5'-AAATCGCTCCACCAACTAAGAA-3'

### **In Vitro Glutathione S-transferase (GST) Binding Assays**

We have shown previously that the prokaryotic expression plasmids pGEX2TK, pGEX2TK-RB1, pGEX5X1-rat ARRB1 (wild-type), pGEX-5X1-rat ARRB1 (amino acids 1-163), pGEX-5X1-rat ARRB1 (amino acids 163-418) yield purified GST-fusion proteins (3, 8, 9). BL21 strain of *Escherichia coli* (*E. coli*) cells were transformed with the above plasmids and grown in Luria Bertani (LB) medium (Fisher Scientific) containing 100 µg/mL ampicillin

(Fisher Bioreagents, Pittsburgh, PA). Overnight cultures were diluted four-fold in LB medium containing 100 µg/mL ampicillin and incubated at 37°C until the optical density at 600 nm (OD<sub>600</sub>) reached 0.5. After induction with 0.5 mM isopropylthiogalactoside (IPTG), bacteria were allowed to grow at 30°C for an additional 6 hours. Bacteria were then harvested, washed in PBS, snap-frozen in liquid nitrogen and kept overnight at -80°C. Next day cells were resuspended in lysis buffer (PBS with 0.5% Tween-20, 150 mM NaCl, 1 mM EDTA, 5 mM sarkosyl, 1 mg/mL lysozyme, 0.1 mg/mL DNase1, 1 mM DTT, 0.5 mM sodium orthovanadate, 0.5 mM sodium fluoride, pH 7.4) and lysed by sonication. After centrifugation at 10,000 g at 4°C for 15 minutes, the supernatant was incubated with glutathione-Sepharose beads (GE healthcare, Piscataway, NJ) at 4°C for 1 hour. The beads were washed four times in PBS and stored at 4°C as a 15% suspension in PBS in the presence of a mixture of protease inhibitors namely 5 µg/mL leupeptin, 5 µg/mL pepstatin, 5 µg/mL trypsin-chymotrypsin-inhibitor, 5 µg/mL aprotinin and 1 mM PMSF. The amount of GST-tagged proteins bound to the beads was quantified using the Bio-Rad Protein Assay Kit.

In vitro transcription and translation of the following constructs was performed using the rabbit reticulocyte lysate translation system (Promega, Madison, MI), according to the manufacturer's instructions—pcDNA3-E2F1 (amino acids 89-304)-VP16; pcDNA3-GAL4-E2F1 (amino acids 304-437); pcDNA3-E2F1 (amino acids 103-284); pcDNA3-HA-E2F1; pcDNA3-FLAG-E2F2; pcDNA3-Myc-E2F3; pcDNA3-FLAG-rat ARRB1 (wild-type). GST pull-down assays were performed by adding equal amounts of GST fusion proteins to 5 µL of the above-prepared <sup>35</sup>S-methionine-labeled rabbit reticulocyte lysates in 200 µL of protein binding buffer (20 mM Tris-HCl [pH 7.5], 50 mM KCl, 0.5 mM EDTA, 0.5% IGEPAL-CA630, 1 mM DTT, 0.5 mM sodium fluoride, 0.5 mM sodium orthovanadate, 5 mg/mL BSA, 5 µg/mL leupeptin, 5 µg/mL pepstatin, 5 µg/mL trypsin-chymotrypsin inhibitor, 5 µg/mL aprotinin and 1 mM PMSF) and rotated on a nutator at 4°C for 2 hours. The beads

were washed four times in binding buffer, and bound proteins were eluted in SDS sample buffer. Proteins were resolved on a 10% SDS–polyacrylamide gel, and visualized by autoradiography on a blue sensitive x-ray film (Midsco, St. Louis, MO). Approximately, one-fifth of the protein amount used in the binding assay was used for control samples (3, 9, 10). The experiment was repeated two independent times.

## **References**

1. Dasgupta P, Rastogi S, Pillai S, Ordonez-Ercan D, Morris M, Haura E, et al. Nicotine induces cell proliferation by beta-arrestin-mediated activation of Src and Rb-Raf-1 pathways. *J Clin Invest* 2006;116(8):2208-2217.
2. Dasgupta P, Chellappan SP. Nicotine-mediated cell proliferation and angiogenesis: new twists to an old story. *Cell Cycle* 2006;5(20):2324-8.
3. Dasgupta P, Sun J, Wang S, Fusaro G, Betts V, Padmanabhan J, et al. Disruption of the Rb--Raf-1 interaction inhibits tumor growth and angiogenesis. *Mol Cell Biol* 2004;24(21):9527-41.
4. Wang S, Nath N, Fusaro G, Chellappan S. Rb and prohibitin target distinct regions of E2F1 for repression and respond to different upstream signals. *Mol Cell Biol* 1999;19(11):7447-60.
5. Wang S, Fusaro G, Padmanabhan J, Chellappan SP. Prohibitin co-localizes with Rb in the nucleus and recruits N-CoR and HDAC1 for transcriptional repression. *Oncogene* 2002;21(55):8388-96.

6. Rastogi S, Joshi B, Dasgupta P, Morris M, Wright K, Chellappan S. Prohibitin facilitates cellular senescence by recruiting specific corepressors to inhibit E2F target genes. *Mol Cell Biol* 2006;26(11):4161-71.
7. Davis R, Rizwani W, Banerjee S, Kovacs M, Haura E, Coppola D, et al. Nicotine promotes tumor growth and metastasis in mouse models of lung cancer. *PLoS One* 2009;4(10):e7524.
8. Luttrell LM, Ferguson SS, Daaka Y, Miller WE, Maudsley S, Della Rocca GJ, et al. Beta-arrestin-dependent formation of beta2 adrenergic receptor-Src protein kinase complexes. *Science* 1999;283(5402):655-61.
9. Dasgupta P, Betts V, Rastogi S, Joshi B, Morris M, Brennan B, et al. Direct binding of apoptosis signal-regulating kinase 1 to retinoblastoma protein: novel links between apoptotic signaling and cell cycle machinery. *J Biol Chem* 2004;279(37):38762-9.
10. Rastogi S, Joshi B, Fusaro G, Chellappan S. Camptothecin induces nuclear export of prohibitin preferentially in transformed cells through a CRM-1-dependent mechanism. *J Biol Chem* 2006;281(5):2951-9.
